# Supplementary material for: Molecular mechanism of a potassium channel gating through activation gate-selectivity filter coupling
Source: PubMed Central journal article supplement (PMC6879586; doi:10.1038/s41467-019-13227-w), 2019-11-26
Supplement: 41467_2019_13227_MOESM8_ESM.pdf [file 41467_2019_13227_MOESM8_ESM.pdf]

**Title:** Supplementary Movie 1.

**Description:** Conformations of MthK with varying degrees of the AG opening, obtained with the AMBER force field.

**Title:** Supplementary Movie 2.

**Description:** Conformations of MthK with varying degrees of the AG opening, obtained with the CHARMM force field.

**Title:** Supplementary Movie 3.

**Description:** Collective motion of MthK that maximally correlates with T59 widening, obtained with the functional mode analysis in the CHARMM force field.

**Title:** Supplementary Movie 4.

**Description:** Collective motion of MthK that maximally correlates with T59 widening, obtained with the functional mode analysis in the AMBER force field.

**Title:** Supplementary Software.

**Description:** FORTRAN code analysing various properties of GROMACS (.xtc) trajectories of potassium channels - number of ion permeation events, occupancy of each site in the selectivity filter, and flips of carbonyl oxygens.
